# Supplementary material for: Large-pore mesoporous Ca–Si-based bioceramics with high in vitro bioactivity and protein adsorption capability for bone tissue regeneration
Source: Royal Society of Chemistry journal article supplement (doi:10.1039/c6tb00454g), 2016-01-01
Supplement: c6tb00454g1.pdf [file c6tb00454g1.pdf]

## Supporting Information

### Large pore mesoporous Ca-Si-based bioceramic with high *in vitro* bioactivity and adsorption capability of protein for bone tissue regeneration

Xingdi Zhang<sup>1</sup>, Deliang Zeng<sup>2</sup>, Nan Li<sup>1</sup>, Xinquan Jiang<sup>2</sup>, Changsheng Liu<sup>3</sup> and Yongsheng Li<sup>1\*</sup>

1. Lab of Low-Dimensional Materials Chemistry, Key Laboratory for Ultrafine Materials of Ministry of Education, School of Materials Science and Engineering, East China University of Science and Technology, Shanghai 200237, China

2. Department of Prosthodontics, Ninth People's Hospital affiliated to Shanghai Jiao Tong University, School of Medicine, Shanghai 200011, China

3. Engineering Research Center for Biomedical Materials of Ministry of Education, East China University of Science and Technology, Shanghai 200237, China

\*Corresponding authors. E-mail addresses: ysli@ecust.edu.cn (Y. Li)

**Table S1** Nucleotide sequences for real-time RT-PCR primers

| Gene          | Direction | Primer sequence (5'-3')  |
|---------------|-----------|--------------------------|
| ALP           | Forward   | GTCCCACAAGAGCCCACAAT     |
|               | Reverse   | CAACGGCAGAGCCAGGAAT      |
| PPAR $\gamma$ | Forward   | CAGGCTTGCTGAACGTGAAG     |
|               | Reverse   | ACGTGCTCTGTGACAATCTGC    |
| OCN           | Forward   | CAGTAAGGTGGTGAATAGACTCCG |
|               | Reverse   | GGTGCCATAGATGCGCTTG      |
| OPG           | Forward   | TGGATGAACCAAGCGTGGA      |
|               | Reverse   | TCGCCTGACTGTCGATAGCA     |
| GAPDH         | Forward   | TTCGACAGTCAGCCGCATCTT    |
|               | Reverse   | ATCCGTTGACTCCGACCTTCA    |

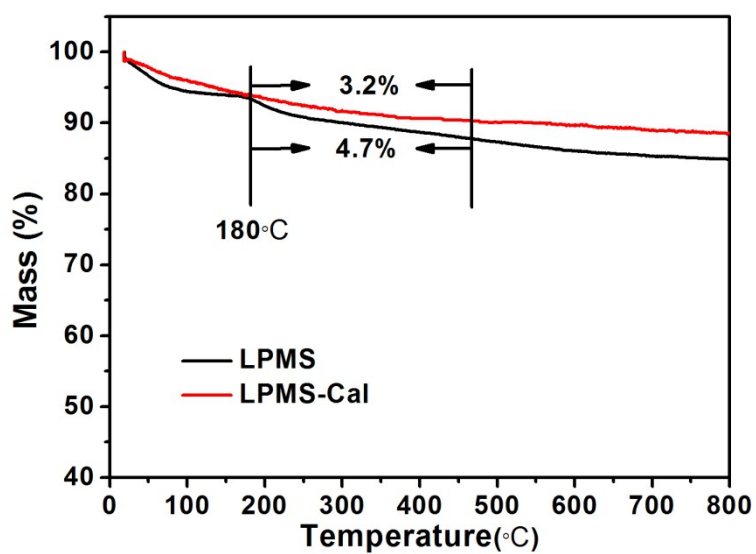

Fig.S1 TG curves for LPMS and LPMS-Cal.

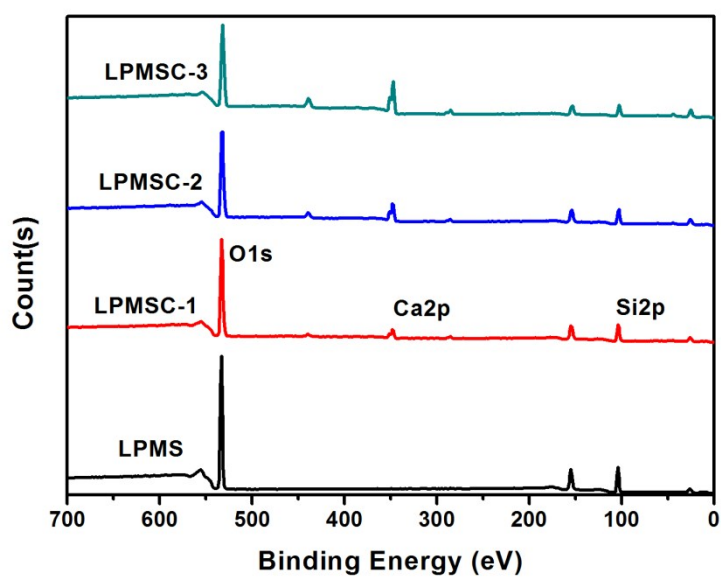

Fig.S2 XPS analysis of LPMS and LPMSCs

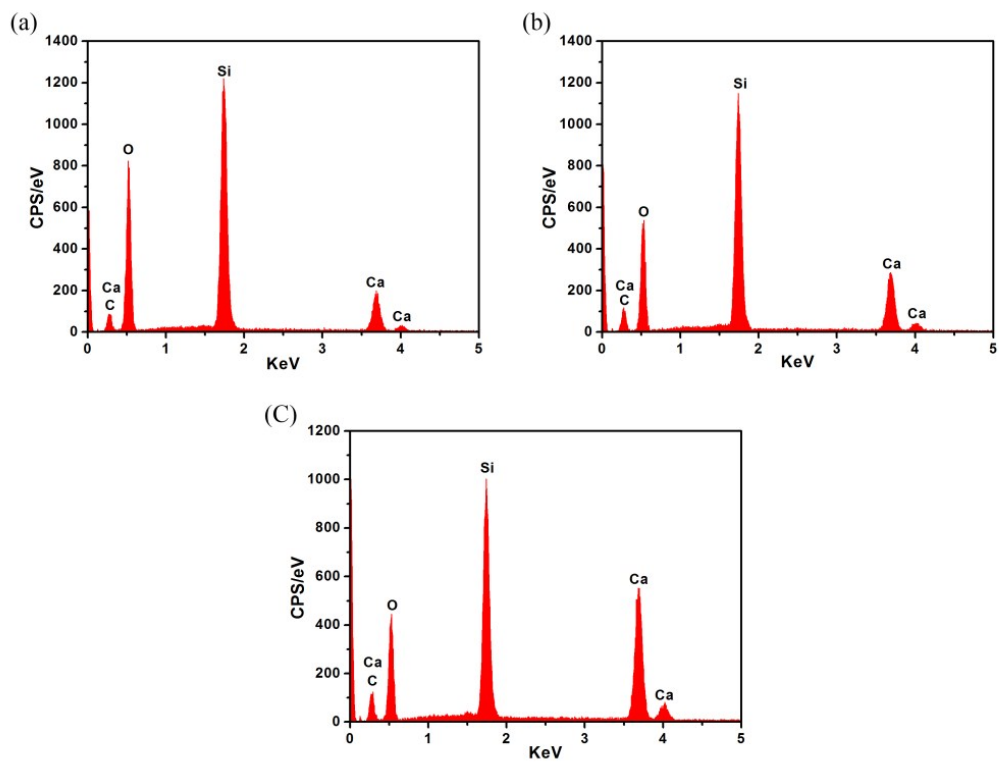

**Fig.S3** EDS analysis for (a) LPMSC-1, (b) LPMSC-2 and (c) LPMSC-3

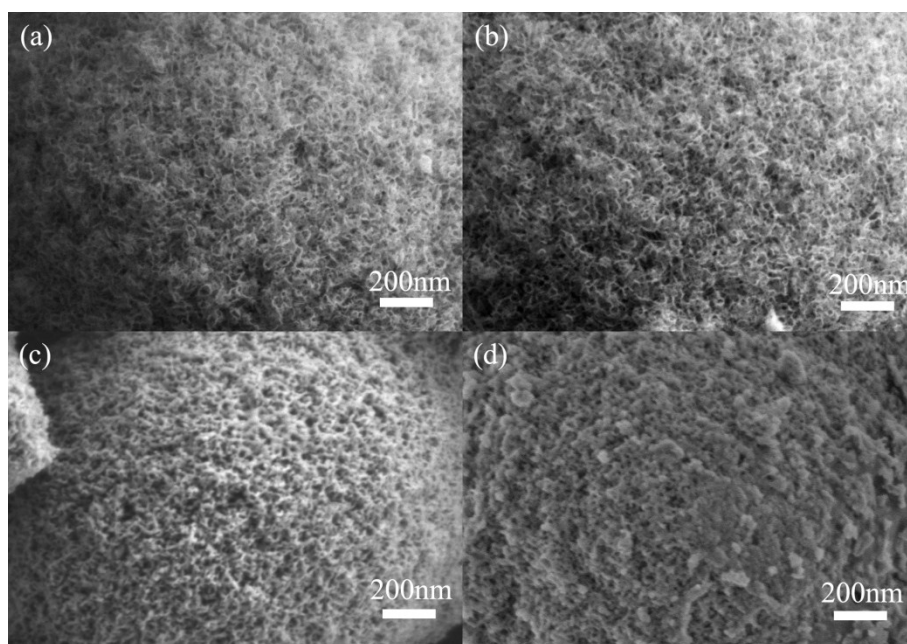

**Fig.S4** SEM images of (a) LPMSC, (b) LPMSC-1, (c) LPMSC-2 and (d) LPMSC-3 in high magnification

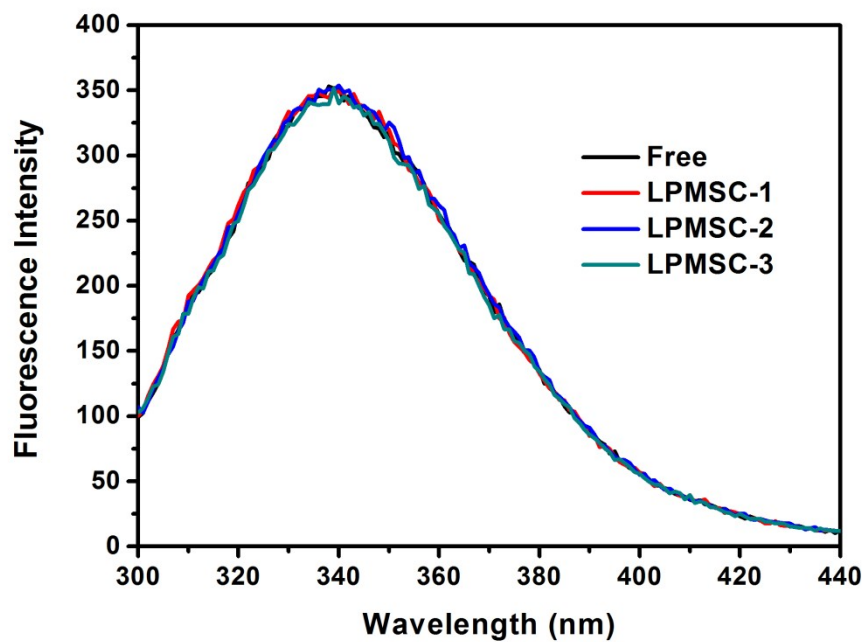

**Fig.S5** Intrinsic fluorescence emission of (a) free BSA, (b) BSA desorbed from LPMSC-1, (c) BSA desorbed from LPMSC-2 and (d) BSA desorbed from LPMSC-3
